# Supplementary material for: Identification of reactive intermediate formation and bioactivation pathways in Abemaciclib metabolism by LC–MS/MS: in vitro metabolic investigation
Source: R Soc Open Sci. 2019 Jan 23;6(1):181714. doi: 10.1098/rsos.181714 (PMC6366225; doi:10.1098/rsos.181714)
Supplement: ESM file 8 [file rsos181714supp8.xls]

## Sheet: Sheet1
+ EIC Product Ion (** -> 393.0) ABC RLM 521.d
Index	X	Y
0	0	0
1	0.008	0
2	0.015	0
3	0.023	0
4	0.03	0
5	0.037	0
6	0.045	0
7	0.052	0
8	0.06	0
9	0.067	0
10	0.075	0
11	0.082	0
12	0.09	0
13	0.097	0
14	0.105	0
15	0.112	0
16	0.119	0
17	0.127	0
18	0.134	0
19	0.142	0
20	0.149	0
21	0.157	0
22	0.164	0
23	0.172	0
24	0.179	0
25	0.187	0
26	0.194	0
27	0.201	0
28	0.209	0
29	0.216	0
30	0.224	0
31	0.231	0
32	0.239	0
33	0.246	0
34	0.254	0
35	0.261	0
36	0.269	0
37	0.276	0
38	0.283	0
39	0.291	0
40	0.298	0
41	0.306	0
42	0.313	0
43	0.321	0
44	0.328	0
45	0.336	0
46	0.343	0
47	0.351	0
48	0.358	0
49	0.365	0
50	0.373	0
51	0.38	0
52	0.388	0
53	0.395	0
54	0.403	0
55	0.41	0
56	0.418	0
57	0.425	0
58	0.433	0
59	0.44	0
60	0.447	0
61	0.455	0
62	0.462	0
63	0.47	0
64	0.477	0
65	0.485	0
66	0.492	0
67	0.5	0
68	0.507	0
69	0.515	0
70	0.522	0
71	0.529	0
72	0.537	0
73	0.544	0
74	0.552	0
75	0.559	0
76	0.567	0
77	0.574	0
78	0.582	0
79	0.589	0
80	0.596	0
81	0.604	0
82	0.611	0
83	0.619	0
84	0.626	0
85	0.634	0
86	0.641	0
87	0.649	0
88	0.656	0
89	0.664	0
90	0.671	0
91	0.678	0
92	0.686	0
93	0.693	0
94	0.701	0
95	0.708	0
96	0.716	0
97	0.723	0
98	0.731	0
99	0.738	0
100	0.746	0
101	0.753	0
102	0.76	0
103	0.768	0
104	0.775	0
105	0.783	0
106	0.79	0
107	0.798	0
108	0.805	0
109	0.813	0
110	0.82	0
111	0.828	0
112	0.835	0
113	0.842	0
114	0.85	0
115	0.857	0
116	0.865	0
117	0.872	0
118	0.88	0
119	0.887	0
120	0.895	0
121	0.902	0
122	0.91	0
123	0.917	0
124	0.924	0
125	0.932	0
126	0.939	0
127	0.947	0
128	0.954	0
129	0.962	0
130	0.969	0
131	0.977	0
132	0.984	0
133	0.992	0
134	0.999	0
135	1.006	0
136	1.014	0
137	1.021	0
138	1.029	0
139	1.036	0
140	1.044	0
141	1.051	0
142	1.059	0
143	1.066	0
144	1.074	0
145	1.081	0
146	1.088	0
147	1.096	0
148	1.103	0
149	1.111	0
150	1.118	0
151	1.126	0
152	1.133	0
153	1.141	0
154	1.148	0
155	1.156	0
156	1.163	0
157	1.17	0
158	1.178	0
159	1.185	0
160	1.193	0
161	1.2	0
162	1.208	0
163	1.215	0
164	1.223	0
165	1.23	0
166	1.238	0
167	1.245	0
168	1.252	0
169	1.26	0
170	1.267	0
171	1.275	0
172	1.282	0
173	1.29	0
174	1.297	0
175	1.305	0
176	1.312	0
177	1.32	0
178	1.327	0
179	1.334	0
180	1.342	0
181	1.349	0
182	1.357	0
183	1.364	0
184	1.372	0
185	1.379	0
186	1.387	0
187	1.394	0
188	1.402	0
189	1.409	0
190	1.416	0
191	1.424	0
192	1.431	0
193	1.439	0
194	1.446	0
195	1.454	0
196	1.461	0
197	1.469	0
198	1.476	0
199	1.484	0
200	1.491	0
201	1.498	0
202	1.506	0
203	1.513	0
204	1.521	0
205	1.528	0
206	1.536	0
207	1.543	0
208	1.551	0
209	1.558	0
210	1.565	0
211	1.573	0
212	1.58	0
213	1.588	0
214	1.595	0
215	1.603	0
216	1.61	0
217	1.618	0
218	1.625	0
219	1.633	0
220	1.64	0
221	1.647	0
222	1.655	0
223	1.662	0
224	1.67	0
225	1.677	0
226	1.685	0
227	1.692	0
228	1.7	0
229	1.707	0
230	1.715	0
231	1.722	0
232	1.729	0
233	1.737	0
234	1.744	0
235	1.752	0
236	1.759	0
237	1.767	0
238	1.774	0
239	1.782	0
240	1.789	0
241	1.797	0
242	1.804	0
243	1.811	0
244	1.819	0
245	1.826	0
246	1.834	0
247	1.841	0
248	1.849	0
249	1.856	0
250	1.864	0
251	1.871	0
252	1.879	0
253	1.886	0
254	1.893	0
255	1.901	0
256	1.908	0
257	1.916	0
258	1.923	0
259	1.931	0
260	1.938	0
261	1.946	0
262	1.953	0
263	1.961	0
264	1.968	0
265	1.975	0
266	1.983	0
267	1.99	0
268	1.998	0
269	2.005	0
270	2.013	0
271	2.02	0
272	2.028	0
273	2.035	0
274	2.043	0
275	2.05	0
276	2.057	0
277	2.065	0
278	2.072	0
279	2.08	0
280	2.087	0
281	2.095	0
282	2.102	0
283	2.11	0
284	2.117	0
285	2.125	0
286	2.132	0
287	2.139	0
288	2.147	0
289	2.154	0
290	2.162	0
291	2.169	0
292	2.177	0
293	2.184	0
294	2.192	0
295	2.199	0
296	2.207	0
297	2.214	0
298	2.221	0
299	2.229	0
300	2.236	0
301	2.244	0
302	2.251	0
303	2.259	0
304	2.266	0
305	2.274	0
306	2.281	0
307	2.289	0
308	2.296	0
309	2.303	0
310	2.311	0
311	2.318	0
312	2.326	0
313	2.333	0
314	2.341	0
315	2.348	0
316	2.356	0
317	2.363	0
318	2.371	0
319	2.378	0
320	2.385	0
321	2.393	0
322	2.4	0
323	2.408	0
324	2.415	0
325	2.423	0
326	2.43	0
327	2.438	0
328	2.445	0
329	2.453	0
330	2.46	0
331	2.467	0
332	2.475	0
333	2.482	0
334	2.49	0
335	2.497	0
336	2.505	0
337	2.512	0
338	2.52	0
339	2.527	0
340	2.534	0
341	2.542	0
342	2.549	0
343	2.557	0
344	2.564	0
345	2.572	0
346	2.579	0
347	2.587	0
348	2.594	0
349	2.602	0
350	2.609	0
351	2.616	0
352	2.624	0
353	2.631	0
354	2.639	0
355	2.646	0
356	2.654	0
357	2.661	0
358	2.669	0
359	2.676	0
360	2.684	0
361	2.691	0
362	2.698	0
363	2.706	0
364	2.713	0
365	2.721	0
366	2.728	0
367	2.736	0
368	2.743	0
369	2.751	0
370	2.758	0
371	2.766	0
372	2.773	0
373	2.78	0
374	2.788	0
375	2.795	0
376	2.803	0
377	2.81	0
378	2.818	0
379	2.825	0
380	2.833	0
381	2.84	0
382	2.848	0
383	2.855	0
384	2.862	0
385	2.87	0
386	2.877	0
387	2.885	0
388	2.892	0
389	2.9	0
390	2.907	0
391	2.915	0
392	2.922	0
393	2.93	0
394	2.937	0
395	2.944	0
396	2.952	0
397	2.959	0
398	2.967	0
399	2.974	0
400	2.982	0
401	2.989	0
402	2.997	0
403	3.004	0
404	3.012	0
405	3.019	0
406	3.026	0
407	3.034	0
408	3.041	0
409	3.049	0
410	3.056	0
411	3.064	0
412	3.071	0
413	3.079	0
414	3.086	0
415	3.094	0
416	3.101	0
417	3.108	0
418	3.116	0
419	3.123	0
420	3.131	0
421	3.138	0
422	3.146	0
423	3.153	0
424	3.161	0
425	3.168	0
426	3.176	0
427	3.183	0
428	3.19	0
429	3.198	0
430	3.205	0
431	3.213	0
432	3.22	0
433	3.228	0
434	3.235	0
435	3.243	0
436	3.25	0
437	3.258	0
438	3.265	0
439	3.272	0
440	3.28	0
441	3.287	0
442	3.295	0
443	3.302	0
444	3.31	0
445	3.317	0
446	3.325	0
447	3.332	0
448	3.34	0
449	3.347	0
450	3.354	0
451	3.362	0
452	3.369	0
453	3.377	0
454	3.384	0
455	3.392	0
456	3.399	0
457	3.407	0
458	3.414	0
459	3.422	0
460	3.429	0
461	3.436	0
462	3.444	0
463	3.451	0
464	3.459	0
465	3.466	0
466	3.474	0
467	3.481	0
468	3.489	0
469	3.496	0
470	3.503	0
471	3.511	0
472	3.518	0
473	3.526	0
474	3.533	0
475	3.541	0
476	3.548	0
477	3.556	0
478	3.563	0
479	3.571	0
480	3.578	0
481	3.585	0
482	3.593	0
483	3.6	0
484	3.608	0
485	3.615	0
486	3.623	0
487	3.63	0
488	3.638	0
489	3.645	0
490	3.653	0
491	3.66	0
492	3.667	0
493	3.675	0
494	3.682	0
495	3.69	0
496	3.697	0
497	3.705	0
498	3.712	0
499	3.72	0
500	3.727	0
501	3.735	0
502	3.742	0
503	3.749	0
504	3.757	0
505	3.764	0
506	3.772	0
507	3.779	0
508	3.787	0
509	3.794	0
510	3.802	0
511	3.809	0
512	3.817	0
513	3.824	0
514	3.831	0
515	3.839	0
516	3.846	0
517	3.854	0
518	3.861	0
519	3.869	0
520	3.876	0
521	3.884	0
522	3.891	0
523	3.899	0
524	3.906	0
525	3.913	0
526	3.921	0
527	3.928	0
528	3.936	0
529	3.943	0
530	3.951	0
531	3.958	0
532	3.966	0
533	3.973	0
534	3.981	0
535	3.988	0
536	3.995	0
537	4.003	0
538	4.01	0
539	4.018	0
540	4.025	0
541	4.033	0
542	4.04	0
543	4.048	0
544	4.055	0
545	4.063	0
546	4.07	0
547	4.077	0
548	4.085	0
549	4.092	0
550	4.1	0
551	4.107	0
552	4.115	0
553	4.122	0
554	4.13	0
555	4.137	0
556	4.145	0
557	4.152	0
558	4.159	0
559	4.167	0
560	4.174	0
561	4.182	0
562	4.189	0
563	4.197	0
564	4.204	0
565	4.212	0
566	4.219	0
567	4.227	0
568	4.234	0
569	4.241	0
570	4.249	0
571	4.256	0
572	4.264	0
573	4.271	0
574	4.279	0
575	4.286	0
576	4.294	0
577	4.301	0
578	4.309	0
579	4.316	0
580	4.323	0
581	4.331	0
582	4.338	0
583	4.346	0
584	4.353	0
585	4.361	0
586	4.368	0
587	4.376	0
588	4.383	0
589	4.391	0
590	4.398	0
591	4.405	0
592	4.413	0
593	4.42	0
594	4.428	0
595	4.435	0
596	4.443	0
597	4.45	0
598	4.458	0
599	4.465	0
600	4.472	0
601	4.48	0
602	4.487	0
603	4.495	0
604	4.502	0
605	4.51	0
606	4.517	0
607	4.525	0
608	4.532	0
609	4.54	0
610	4.547	0
611	4.554	0
612	4.562	0
613	4.569	0
614	4.577	0
615	4.584	0
616	4.592	0
617	4.599	0
618	4.607	0
619	4.614	0
620	4.622	0
621	4.629	0
622	4.636	0
623	4.644	0
624	4.651	0
625	4.659	0
626	4.666	0
627	4.674	0
628	4.681	0
629	4.689	0
630	4.696	0
631	4.704	0
632	4.711	0
633	4.718	0
634	4.726	0
635	4.733	0
636	4.741	0
637	4.748	0
638	4.756	0
639	4.763	0
640	4.771	0
641	4.778	0
642	4.786	0
643	4.793	0
644	4.8	0
645	4.808	0
646	4.815	0
647	4.823	0
648	4.83	0
649	4.838	0
650	4.845	0
651	4.853	0
652	4.86	0
653	4.868	0
654	4.875	0
655	4.882	0
656	4.89	0
657	4.897	0
658	4.905	0
659	4.912	0
660	4.92	0
661	4.927	0
662	4.935	0
663	4.942	0
664	4.95	0
665	4.957	0
666	4.964	0
667	4.972	0
668	4.979	0
669	4.987	0
670	4.994	0
671	5.002	0
672	5.009	0
673	5.017	0
674	5.024	0
675	5.032	0
676	5.039	0
677	5.046	0
678	5.054	0
679	5.061	0
680	5.069	0
681	5.076	0
682	5.084	0
683	5.091	0
684	5.099	0
685	5.106	0
686	5.114	0
687	5.121	0
688	5.128	0
689	5.136	0
690	5.143	0
691	5.151	0
692	5.158	0
693	5.166	0
694	5.173	0
695	5.181	0
696	5.188	0
697	5.196	0
698	5.203	0
699	5.21	0
700	5.218	0
701	5.225	0
702	5.233	0
703	5.24	0
704	5.248	0
705	5.255	0
706	5.263	0
707	5.27	0
708	5.278	0
709	5.285	0
710	5.292	0
711	5.3	0
712	5.307	0
713	5.315	0
714	5.322	0
715	5.33	0
716	5.337	0
717	5.345	0
718	5.352	0
719	5.36	0
720	5.367	0
721	5.374	0
722	5.382	0
723	5.389	0
724	5.397	0
725	5.404	0
726	5.412	0
727	5.419	0
728	5.427	0
729	5.434	0
730	5.442	0
731	5.449	0
732	5.456	0
733	5.464	0
734	5.471	0
735	5.479	0
736	5.486	0
737	5.494	0
738	5.501	0
739	5.509	0
740	5.516	0
741	5.523	0
742	5.531	0
743	5.538	0
744	5.546	0
745	5.553	0
746	5.561	0
747	5.568	0
748	5.576	0
749	5.583	0
750	5.591	0
751	5.598	0
752	5.605	0
753	5.613	0
754	5.62	0
755	5.628	0
756	5.635	0
757	5.643	0
758	5.65	0
759	5.658	0
760	5.665	0
761	5.673	0
762	5.68	0
763	5.687	0
764	5.695	0
765	5.702	0
766	5.71	0
767	5.717	0
768	5.725	0
769	5.732	0
770	5.74	0
771	5.747	0
772	5.755	0
773	5.762	0
774	5.769	0
775	5.777	0
776	5.784	0
777	5.792	0
778	5.799	0
779	5.807	0
780	5.814	0
781	5.822	0
782	5.829	0
783	5.837	0
784	5.844	0
785	5.851	0
786	5.859	0
787	5.866	0
788	5.874	0
789	5.881	0
790	5.889	0
791	5.896	0
792	5.904	0
793	5.911	0
794	5.919	0
795	5.926	0
796	5.933	0
797	5.941	0
798	5.948	0
799	5.956	0
800	5.963	0
801	5.971	0
802	5.978	0
803	5.986	0
804	5.993	0
805	6.001	0
806	6.008	0
807	6.015	0
808	6.023	0
809	6.03	0
810	6.038	0
811	6.045	0
812	6.053	0
813	6.06	0
814	6.068	0
815	6.075	0
816	6.083	0
817	6.09	0
818	6.097	0
819	6.105	0
820	6.112	0
821	6.12	0
822	6.127	0
823	6.135	0
824	6.142	0
825	6.15	0
826	6.157	0
827	6.165	0
828	6.172	0
829	6.179	0
830	6.187	0
831	6.194	0
832	6.202	0
833	6.209	0
834	6.217	0
835	6.224	0
836	6.232	0
837	6.239	0
838	6.247	0
839	6.254	0
840	6.261	0
841	6.269	0
842	6.276	0
843	6.284	0
844	6.291	0
845	6.299	0
846	6.306	0
847	6.314	0
848	6.321	0
849	6.329	0
850	6.336	0
851	6.343	0
852	6.351	0
853	6.358	0
854	6.366	0
855	6.373	0
856	6.381	0
857	6.388	0
858	6.396	0
859	6.403	0
860	6.411	0
861	6.418	0
862	6.425	0
863	6.433	0
864	6.44	0
865	6.448	0
866	6.455	0
867	6.463	0
868	6.47	0
869	6.478	0
870	6.485	0
871	6.492	0
872	6.5	0
873	6.507	0
874	6.515	0
875	6.522	0
876	6.53	0
877	6.537	0
878	6.545	0
879	6.552	0
880	6.56	0
881	6.567	0
882	6.574	0
883	6.582	0
884	6.589	0
885	6.597	0
886	6.604	0
887	6.612	0
888	6.619	0
889	6.627	0
890	6.634	0
891	6.642	0
892	6.649	0
893	6.656	0
894	6.664	0
895	6.671	0
896	6.679	0
897	6.686	0
898	6.694	0
899	6.701	0
900	6.709	0
901	6.716	0
902	6.724	0
903	6.731	0
904	6.738	0
905	6.746	0
906	6.753	0
907	6.761	0
908	6.768	0
909	6.776	0
910	6.783	0
911	6.791	0
912	6.798	0
913	6.806	0
914	6.813	0
915	6.82	0
916	6.828	0
917	6.835	0
918	6.843	0
919	6.85	0
920	6.858	0
921	6.865	0
922	6.873	0
923	6.88	0
924	6.888	0
925	6.895	0
926	6.902	0
927	6.91	0
928	6.917	0
929	6.925	0
930	6.932	0
931	6.94	0
932	6.947	0
933	6.955	0
934	6.962	0
935	6.97	0
936	6.977	0
937	6.984	0
938	6.992	0
939	6.999	0
940	7.007	0
941	7.014	0
942	7.022	0
943	7.029	0
944	7.037	0
945	7.044	0
946	7.052	0
947	7.059	0
948	7.066	0
949	7.074	0
950	7.081	0
951	7.089	0
952	7.096	0
953	7.104	0
954	7.111	0
955	7.119	0
956	7.126	0
957	7.134	0
958	7.141	0
959	7.148	0
960	7.156	0
961	7.163	0
962	7.171	0
963	7.178	0
964	7.186	0
965	7.193	0
966	7.201	0
967	7.208	0
968	7.216	0
969	7.223	0
970	7.23	0
971	7.238	0
972	7.245	0
973	7.253	0
974	7.26	0
975	7.268	0
976	7.275	0
977	7.283	0
978	7.29	0
979	7.298	0
980	7.305	0
981	7.312	0
982	7.32	0
983	7.327	0
984	7.335	0
985	7.342	0
986	7.35	0
987	7.357	0
988	7.365	0
989	7.372	0
990	7.38	0
991	7.387	0
992	7.394	0
993	7.402	0
994	7.409	0
995	7.417	0
996	7.424	0
997	7.432	0
998	7.439	0
999	7.447	0
1000	7.454	0
1001	7.461	0
1002	7.469	0
1003	7.476	0
1004	7.484	0
1005	7.491	0
1006	7.499	0
1007	7.506	0
1008	7.514	0
1009	7.521	0
1010	7.529	0
1011	7.536	0
1012	7.543	0
1013	7.551	0
1014	7.558	0
1015	7.566	0
1016	7.573	0
1017	7.581	0
1018	7.588	0
1019	7.596	0
1020	7.603	0
1021	7.611	0
1022	7.618	0
1023	7.625	0
1024	7.633	0
1025	7.64	0
1026	7.648	0
1027	7.655	0
1028	7.663	0
1029	7.67	0
1030	7.678	0
1031	7.685	0
1032	7.693	0
1033	7.7	0
1034	7.707	0
1035	7.715	0
1036	7.722	0
1037	7.73	0
1038	7.737	0
1039	7.745	0
1040	7.752	0
1041	7.76	0
1042	7.767	0
1043	7.775	0
1044	7.782	0
1045	7.789	0
1046	7.797	0
1047	7.804	0
1048	7.812	0
1049	7.819	0
1050	7.827	0
1051	7.834	0
1052	7.842	0
1053	7.849	0
1054	7.857	0
1055	7.864	0
1056	7.871	0
1057	7.879	0
1058	7.886	0
1059	7.894	0
1060	7.901	0
1061	7.909	0
1062	7.916	0
1063	7.924	0
1064	7.931	0
1065	7.939	0
1066	7.946	0
1067	7.953	0
1068	7.961	0
1069	7.968	0
1070	7.976	0
1071	7.983	0
1072	7.991	0
1073	7.998	0
1074	8.006	0
1075	8.013	0
1076	8.021	0
1077	8.028	0
1078	8.035	0
1079	8.043	0
1080	8.05	0
1081	8.058	0
1082	8.065	0
1083	8.073	0
1084	8.08	0
1085	8.088	0
1086	8.095	0
1087	8.103	0
1088	8.11	0
1089	8.117	0
1090	8.125	0
1091	8.132	0
1092	8.14	0
1093	8.147	0
1094	8.155	0
1095	8.162	0
1096	8.17	0
1097	8.177	0
1098	8.185	0
1099	8.192	0
1100	8.199	0
1101	8.207	0
1102	8.214	0
1103	8.222	0
1104	8.229	0
1105	8.237	0
1106	8.244	0
1107	8.252	0
1108	8.259	0
1109	8.267	0
1110	8.274	0
1111	8.281	0
1112	8.289	0
1113	8.296	0
1114	8.304	0
1115	8.311	0
1116	8.319	0
1117	8.326	0
1118	8.334	0
1119	8.341	0
1120	8.349	0
1121	8.356	0
1122	8.363	0
1123	8.371	0
1124	8.378	0
1125	8.386	0
1126	8.393	0
1127	8.401	0
1128	8.408	0
1129	8.416	0
1130	8.423	0
1131	8.43	0
1132	8.438	0
1133	8.445	0
1134	8.453	0
1135	8.46	0
1136	8.468	0
1137	8.475	0
1138	8.483	0
1139	8.49	0
1140	8.498	0
1141	8.505	0
1142	8.512	0
1143	8.52	0
1144	8.527	0
1145	8.535	0
1146	8.542	0
1147	8.55	0
1148	8.557	0
1149	8.565	0
1150	8.572	0
1151	8.58	0
1152	8.587	0
1153	8.594	0
1154	8.602	0
1155	8.609	0
1156	8.617	0
1157	8.624	0
1158	8.632	0
1159	8.639	0
1160	8.647	0
1161	8.654	0
1162	8.662	0
1163	8.669	0
1164	8.676	0
1165	8.684	0
1166	8.691	0
1167	8.699	0
1168	8.706	0
1169	8.714	0
1170	8.721	0
1171	8.729	0
1172	8.736	0
1173	8.744	0
1174	8.751	0
1175	8.758	0
1176	8.766	0
1177	8.773	0
1178	8.781	0
1179	8.788	0
1180	8.796	0
1181	8.803	0
1182	8.811	0
1183	8.818	0
1184	8.826	0
1185	8.833	0
1186	8.84	0
1187	8.848	0
1188	8.855	0
1189	8.863	0
1190	8.87	0
1191	8.878	0
1192	8.885	0
1193	8.893	0
1194	8.9	0
1195	8.908	0
1196	8.915	0
1197	8.922	0
1198	8.93	0
1199	8.937	0
1200	8.945	0
1201	8.952	0
1202	8.96	0
1203	8.967	0
1204	8.975	0
1205	8.982	0
1206	8.99	0
1207	8.997	0
1208	9.004	0
1209	9.012	0
1210	9.019	0
1211	9.027	0
1212	9.034	0
1213	9.042	0
1214	9.049	0
1215	9.057	0
1216	9.064	0
1217	9.072	0
1218	9.079	0
1219	9.086	0
1220	9.094	0
1221	9.101	0
1222	9.109	0
1223	9.116	0
1224	9.124	0
1225	9.131	0
1226	9.139	0
1227	9.146	0
1228	9.154	0
1229	9.161	0
1230	9.168	0
1231	9.176	0
1232	9.183	0
1233	9.191	0
1234	9.198	0
1235	9.206	0
1236	9.213	0
1237	9.221	0
1238	9.228	0
1239	9.236	0
1240	9.243	0
1241	9.25	0
1242	9.258	0
1243	9.265	0
1244	9.273	0
1245	9.28	0
1246	9.288	0
1247	9.295	0
1248	9.303	0
1249	9.31	0
1250	9.318	0
1251	9.325	0
1252	9.332	0
1253	9.34	0
1254	9.347	0
1255	9.355	0
1256	9.362	0
1257	9.37	0
1258	9.377	0
1259	9.385	0
1260	9.392	0
1261	9.399	0
1262	9.407	0
1263	9.414	0
1264	9.422	0
1265	9.429	0
1266	9.437	0
1267	9.444	0
1268	9.452	0
1269	9.459	0
1270	9.467	0
1271	9.474	0
1272	9.481	0
1273	9.489	0
1274	9.496	0
1275	9.504	0
1276	9.511	0
1277	9.519	0
1278	9.526	0
1279	9.534	0
1280	9.541	0
1281	9.549	0
1282	9.556	0
1283	9.563	0
1284	9.571	0
1285	9.578	0
1286	9.586	0
1287	9.593	0
1288	9.601	0
1289	9.608	0
1290	9.616	0
1291	9.623	0
1292	9.631	0
1293	9.638	0
1294	9.645	0
1295	9.653	0
1296	9.66	0
1297	9.668	0
1298	9.675	0
1299	9.683	0
1300	9.69	0
1301	9.698	0
1302	9.705	0
1303	9.713	0
1304	9.72	0
1305	9.727	0
1306	9.735	0
1307	9.742	0
1308	9.75	0
1309	9.757	0
1310	9.765	0
1311	9.772	0
1312	9.78	0
1313	9.787	0
1314	9.795	0
1315	9.802	0
1316	9.809	0
1317	9.817	0
1318	9.824	0
1319	9.832	0
1320	9.839	0
1321	9.847	0
1322	9.854	0
1323	9.862	0
1324	9.869	0
1325	9.877	0
1326	9.884	0
1327	9.891	0
1328	9.899	0
1329	9.906	0
1330	9.914	0
1331	9.921	0
1332	9.929	0
1333	9.936	0
1334	9.944	0
1335	9.951	0
1336	9.959	0
1337	9.966	0
1338	9.973	0
1339	9.981	0
1340	9.988	0
1341	9.996	0
1342	10.003	0
1343	10.011	0
1344	10.018	0
1345	10.026	0
1346	10.033	0
1347	10.041	0
1348	10.048	0
1349	10.055	0
1350	10.063	0
1351	10.07	0
1352	10.078	0
1353	10.085	0
1354	10.093	0
1355	10.1	0
1356	10.108	0
1357	10.115	0
1358	10.123	0
1359	10.13	0
1360	10.137	0
1361	10.145	0
1362	10.152	0
1363	10.16	0
1364	10.167	0
1365	10.175	0
1366	10.182	0
1367	10.19	0
1368	10.197	0
1369	10.205	0
1370	10.212	0
1371	10.219	0
1372	10.227	0
1373	10.234	0
1374	10.242	0
1375	10.249	0
1376	10.257	0
1377	10.264	0
1378	10.272	0
1379	10.279	0
1380	10.287	0
1381	10.294	0
1382	10.301	0
1383	10.309	0
1384	10.316	0
1385	10.324	0
1386	10.331	0
1387	10.339	0
1388	10.346	0
1389	10.354	0
1390	10.361	0
1391	10.369	0
1392	10.376	0
1393	10.383	0
1394	10.391	0
1395	10.398	0
1396	10.406	0
1397	10.413	0
1398	10.421	0
1399	10.428	0
1400	10.436	0
1401	10.443	0
1402	10.45	0
1403	10.458	0
1404	10.465	0
1405	10.473	0
1406	10.48	0
1407	10.488	0
1408	10.495	0
1409	10.503	0
1410	10.51	0
1411	10.518	0
1412	10.525	0
1413	10.532	0
1414	10.54	0
1415	10.547	0
1416	10.555	0
1417	10.562	0
1418	10.57	0
1419	10.577	0
1420	10.585	0
1421	10.592	0
1422	10.6	0
1423	10.607	0
1424	10.614	0
1425	10.622	0
1426	10.629	0
1427	10.637	0
1428	10.644	0
1429	10.652	0
1430	10.659	0
1431	10.667	0
1432	10.674	0
1433	10.682	0
1434	10.689	0
1435	10.696	0
1436	10.704	0
1437	10.711	0
1438	10.719	0
1439	10.726	0
1440	10.734	0
1441	10.741	0
1442	10.749	0
1443	10.756	0
1444	10.764	0
1445	10.771	0
1446	10.778	0
1447	10.786	0
1448	10.793	0
1449	10.801	0
1450	10.808	0
1451	10.816	0
1452	10.823	0
1453	10.831	0
1454	10.838	0
1455	10.846	0
1456	10.853	0
1457	10.86	0
1458	10.868	0
1459	10.875	0
1460	10.883	0
1461	10.89	0
1462	10.898	0
1463	10.905	0
1464	10.913	0
1465	10.92	0
1466	10.928	0
1467	10.935	0
1468	10.942	0
1469	10.95	0
1470	10.957	0
1471	10.965	0
1472	10.972	0
1473	10.98	0
1474	10.987	0
1475	10.995	0
1476	11.002	0
1477	11.01	0
1478	11.017	0
1479	11.024	0
1480	11.032	0
1481	11.039	0
1482	11.047	0
1483	11.054	0
1484	11.062	0
1485	11.069	0
1486	11.077	0
1487	11.084	0
1488	11.092	0
1489	11.099	0
1490	11.106	0
1491	11.114	0
1492	11.121	0
1493	11.129	0
1494	11.136	0
1495	11.144	0
1496	11.151	0
1497	11.159	0
1498	11.166	0
1499	11.174	0
1500	11.181	0
1501	11.188	0
1502	11.196	0
1503	11.203	0
1504	11.211	0
1505	11.218	0
1506	11.226	0
1507	11.233	0
1508	11.241	0
1509	11.248	0
1510	11.256	0
1511	11.263	0
1512	11.27	0
1513	11.278	0
1514	11.285	0
1515	11.293	0
1516	11.3	0
1517	11.308	0
1518	11.315	0
1519	11.323	0
1520	11.33	0
1521	11.338	0
1522	11.345	0
1523	11.352	0
1524	11.36	0
1525	11.367	0
1526	11.375	0
1527	11.382	0
1528	11.39	0
1529	11.397	0
1530	11.405	0
1531	11.412	0
1532	11.419	0
1533	11.427	0
1534	11.434	0
1535	11.442	0
1536	11.449	0
1537	11.457	0
1538	11.464	0
1539	11.472	0
1540	11.479	0
1541	11.487	0
1542	11.494	0
1543	11.501	0
1544	11.509	0
1545	11.516	0
1546	11.524	0
1547	11.531	0
1548	11.539	0
1549	11.546	0
1550	11.554	0
1551	11.561	0
1552	11.569	0
1553	11.576	0
1554	11.583	0
1555	11.591	0
1556	11.598	0
1557	11.606	0
1558	11.613	0
1559	11.621	0
1560	11.628	0
1561	11.636	0
1562	11.643	0
1563	11.651	0
1564	11.658	0
1565	11.665	0
1566	11.673	0
1567	11.68	0
1568	11.688	0
1569	11.695	0
1570	11.703	0
1571	11.71	0
1572	11.718	0
1573	11.725	0
1574	11.733	0
1575	11.74	0
1576	11.747	0
1577	11.755	0
1578	11.762	0
1579	11.77	0
1580	11.777	0
1581	11.785	0
1582	11.792	0
1583	11.8	0
1584	11.807	0
1585	11.815	0
1586	11.822	0
1587	11.829	0
1588	11.837	0
1589	11.844	0
1590	11.852	0
1591	11.859	0
1592	11.867	0
1593	11.874	0
1594	11.882	0
1595	11.889	0
1596	11.897	0
1597	11.904	0
1598	11.911	0
1599	11.919	0
1600	11.926	0
1601	11.934	0
1602	11.941	0
1603	11.949	0
1604	11.956	0
1605	11.964	0
1606	11.971	0
1607	11.979	0
1608	11.986	0
1609	11.993	0
1610	12.001	0
1611	12.008	0
1612	12.016	0
1613	12.023	0
1614	12.031	0
1615	12.038	0
1616	12.046	0
1617	12.053	0
1618	12.061	0
1619	12.068	0
1620	12.075	0
1621	12.083	0
1622	12.09	0
1623	12.098	0
1624	12.105	0
1625	12.113	0
1626	12.12	0
1627	12.128	0
1628	12.135	0
1629	12.143	0
1630	12.15	0
1631	12.157	0
1632	12.165	0
1633	12.172	0
1634	12.18	0
1635	12.187	0
1636	12.195	0
1637	12.202	0
1638	12.21	0
1639	12.217	0
1640	12.225	0
1641	12.232	0
1642	12.239	0
1643	12.247	0
1644	12.254	0
1645	12.262	0
1646	12.269	0
1647	12.277	0
1648	12.284	0
1649	12.292	0
1650	12.299	0
1651	12.307	0
1652	12.314	0
1653	12.321	0
1654	12.329	0
1655	12.336	0
1656	12.344	0
1657	12.351	0
1658	12.359	0
1659	12.366	0
1660	12.374	0
1661	12.381	0
1662	12.388	0
1663	12.396	0
1664	12.403	0
1665	12.411	0
1666	12.418	0
1667	12.426	0
1668	12.433	0
1669	12.441	0
1670	12.448	0
1671	12.456	0
1672	12.463	0
1673	12.47	0
1674	12.478	0
1675	12.485	0
1676	12.493	0
1677	12.5	0
1678	12.508	0
1679	12.515	0
1680	12.523	0
1681	12.53	0
1682	12.538	0
1683	12.545	0
1684	12.552	0
1685	12.56	0
1686	12.567	0
1687	12.575	0
1688	12.582	0
1689	12.59	0
1690	12.597	0
1691	12.605	0
1692	12.612	0
1693	12.62	0
1694	12.627	0
1695	12.634	0
1696	12.642	0
1697	12.649	0
1698	12.657	0
1699	12.664	0
1700	12.672	0
1701	12.679	0
1702	12.687	0
1703	12.694	0
1704	12.702	0
1705	12.709	0
1706	12.716	0
1707	12.724	0
1708	12.731	0
1709	12.739	0
1710	12.746	0
1711	12.754	0
1712	12.761	0
1713	12.769	0
1714	12.776	0
1715	12.784	0
1716	12.791	0
1717	12.798	0
1718	12.806	0
1719	12.813	0
1720	12.821	0
1721	12.828	0
1722	12.836	0
1723	12.843	0
1724	12.851	0
1725	12.858	0
1726	12.866	0
1727	12.873	0
1728	12.88	0
1729	12.888	0
1730	12.895	0
1731	12.903	0
1732	12.91	0
1733	12.918	0
1734	12.925	0
1735	12.933	0
1736	12.94	0
1737	12.948	0
1738	12.955	0
1739	12.962	0
1740	12.97	0
1741	12.977	0
1742	12.985	0
1743	12.992	0
1744	13	0
1745	13.007	0
1746	13.015	0
1747	13.022	0
1748	13.03	0
1749	13.037	0
1750	13.044	0
1751	13.052	0
1752	13.059	0
1753	13.067	0
1754	13.074	0
1755	13.082	0
1756	13.089	0
1757	13.097	0
1758	13.104	0
1759	13.112	0
1760	13.119	0
1761	13.126	0
1762	13.134	0
1763	13.141	0
1764	13.149	0
1765	13.156	0
1766	13.164	0
1767	13.171	0
1768	13.179	0
1769	13.186	0
1770	13.194	0
1771	13.201	0
1772	13.208	0
1773	13.216	0
1774	13.223	0
1775	13.231	0
1776	13.238	0
1777	13.246	0
1778	13.253	0
1779	13.261	0
1780	13.268	0
1781	13.276	0
1782	13.283	0
1783	13.29	0
1784	13.298	0
1785	13.305	0
1786	13.313	0
1787	13.32	0
1788	13.328	0
1789	13.335	0
1790	13.343	0
1791	13.35	0
1792	13.357	0
1793	13.365	0
1794	13.372	0
1795	13.38	0
1796	13.387	0
1797	13.395	0
1798	13.402	0
1799	13.41	0
1800	13.417	0
1801	13.425	0
1802	13.432	0
1803	13.439	0
1804	13.447	0
1805	13.454	0
1806	13.462	0
1807	13.469	0
1808	13.477	0
1809	13.484	0
1810	13.492	0
1811	13.499	0
1812	13.507	0
1813	13.514	0
1814	13.521	0
1815	13.529	0
1816	13.536	0
1817	13.544	0
1818	13.551	0
1819	13.559	0
1820	13.566	0
1821	13.574	0
1822	13.581	0
1823	13.589	0
1824	13.596	0
1825	13.603	0
1826	13.611	0
1827	13.618	0
1828	13.626	0
1829	13.633	0
1830	13.641	0
1831	13.648	0
1832	13.656	0
1833	13.663	0
1834	13.671	0
1835	13.678	0
1836	13.685	0
1837	13.693	0
1838	13.7	0
1839	13.708	0
1840	13.715	0
1841	13.723	0
1842	13.73	0
1843	13.738	0
1844	13.745	0
1845	13.753	0
1846	13.76	0
1847	13.767	0
1848	13.775	0
1849	13.782	0
1850	13.79	0
1851	13.797	0
1852	13.805	0
1853	13.812	0
1854	13.82	0
1855	13.827	0
1856	13.835	0
1857	13.842	0
1858	13.849	0
1859	13.857	0
1860	13.864	0
1861	13.872	0
1862	13.879	0
1863	13.887	0
1864	13.894	0
1865	13.902	0
1866	13.909	0
1867	13.917	0
1868	13.924	0
1869	13.931	0
1870	13.939	0
1871	13.946	0
1872	13.954	0
1873	13.961	0
1874	13.969	0
1875	13.976	0
1876	13.984	0
1877	13.991	0
1878	13.999	0
1879	14.006	0
1880	14.013	0
1881	14.021	0
1882	14.028	0
1883	14.036	0
1884	14.043	0
1885	14.051	0
1886	14.058	0
1887	14.066	0
1888	14.073	0
1889	14.081	0
1890	14.088	0
1891	14.095	0
1892	14.103	0
1893	14.11	0
1894	14.118	0
1895	14.125	0
1896	14.133	0
1897	14.14	0
1898	14.148	0
1899	14.155	0
1900	14.163	0
1901	14.17	0
1902	14.177	0
1903	14.185	0
1904	14.192	0
1905	14.2	0
1906	14.207	0
1907	14.215	0
1908	14.222	0
1909	14.23	0
1910	14.237	0
1911	14.245	0
1912	14.252	0
1913	14.259	0
1914	14.267	0
1915	14.274	0
1916	14.282	0
1917	14.289	0
1918	14.297	0
1919	14.304	0
1920	14.312	0
1921	14.319	0
1922	14.327	0
1923	14.334	0
1924	14.341	0
1925	14.349	0
1926	14.356	0
1927	14.364	0
1928	14.371	0
1929	14.379	0
1930	14.386	0
1931	14.394	0
1932	14.401	0
1933	14.408	0
1934	14.416	0
1935	14.423	0
1936	14.431	0
1937	14.438	0
1938	14.446	0
1939	14.453	0
1940	14.461	0
1941	14.468	0
1942	14.476	0
1943	14.483	0
1944	14.49	0
1945	14.498	0
1946	14.505	0
1947	14.513	0
1948	14.52	0
1949	14.528	0
1950	14.535	0
1951	14.543	0
1952	14.55	0
1953	14.558	0
1954	14.565	0
1955	14.572	0
1956	14.58	0
1957	14.587	0
1958	14.595	0
1959	14.602	0
1960	14.61	0
1961	14.617	0
1962	14.625	0
1963	14.632	0
1964	14.64	0
1965	14.647	0
1966	14.654	0
1967	14.662	0
1968	14.669	0
1969	14.677	0
1970	14.684	0
1971	14.692	0
1972	14.699	0
1973	14.707	0
1974	14.714	0
1975	14.722	0
1976	14.729	0
1977	14.736	0
1978	14.744	0
1979	14.751	0
1980	14.759	0
1981	14.766	0
1982	14.774	0
1983	14.781	0
1984	14.789	0
1985	14.796	0
1986	14.804	0
1987	14.811	0
1988	14.818	0
1989	14.826	0
1990	14.833	0
1991	14.841	0
1992	14.848	0
1993	14.856	0
1994	14.863	0
1995	14.871	0
1996	14.878	0
1997	14.886	0
[truncated: 4,042 more rows]
