# Supplementary material for: Identification of reactive intermediate formation and bioactivation pathways in Abemaciclib metabolism by LC–MS/MS: in vitro metabolic investigation
Source: R Soc Open Sci. 2019 Jan 23;6(1):181714. doi: 10.1098/rsos.181714 (PMC6366225; doi:10.1098/rsos.181714)
Supplement: ESM file 18 [file rsos181714supp18.xls]

## Sheet: Sheet1
+ TIC Product Ion (** -> **) ABC KCN 532.d
Index	X	Y
0	0	1.41
1	0.008	0.72
2	0.015	0.7
3	0.023	0.2
4	0.03	0.17
5	0.037	0.15
6	0.045	0.15
7	0.052	0.15
8	0.06	0.15
9	0.067	0.15
10	0.075	0.14
11	0.082	0.14
12	0.09	0.13
13	0.097	0.12
14	0.105	0.12
15	0.112	0.11
16	0.119	0.13
17	0.127	0.16
18	0.134	0.19
19	0.142	0.23
20	0.149	0.23
21	0.157	0.22
22	0.164	0.19
23	0.172	0.18
24	0.179	0.17
25	0.187	0.18
26	0.194	0.18
27	0.201	0.19
28	0.209	0.19
29	0.216	0.18
30	0.224	0.17
31	0.231	0.16
32	0.239	0.15
33	0.246	0.15
34	0.254	0.16
35	0.261	0.17
36	0.269	0.17
37	0.276	0.18
38	0.283	0.18
39	0.291	0.18
40	0.298	0.19
41	0.306	0.19
42	0.313	0.18
43	0.321	0.16
44	0.328	0.15
45	0.336	0.13
46	0.343	0.13
47	0.351	0.13
48	0.358	0.13
49	0.365	0.15
50	0.373	0.15
51	0.38	0.16
52	0.388	0.16
53	0.395	0.17
54	0.403	0.18
55	0.41	0.19
56	0.418	0.19
57	0.425	0.17
58	0.433	0.15
59	0.44	0.12
60	0.447	0.11
61	0.455	0.11
62	0.462	0.1
63	0.47	0.1
64	0.477	0.1
65	0.485	0.1
66	0.492	0.11
67	0.5	0.1
68	0.507	0.11
69	0.515	0.11
70	0.522	0.11
71	0.529	0.12
72	0.537	0.11
73	0.544	0.11
74	0.552	0.11
75	0.559	0.11
76	0.567	0.11
77	0.574	0.1
78	0.582	0.11
79	0.589	0.11
80	0.596	0.12
81	0.604	0.12
82	0.611	0.12
83	0.619	0.12
84	0.626	0.12
85	0.634	0.12
86	0.641	0.12
87	0.649	0.12
88	0.656	0.11
89	0.664	0.1
90	0.671	0.09
91	0.678	0.09
92	0.686	0.1
93	0.693	0.11
94	0.701	0.12
95	0.708	0.12
96	0.716	0.13
97	0.723	0.15
98	0.731	0.15
99	0.738	0.16
100	0.746	0.15
101	0.753	0.15
102	0.76	0.16
103	0.768	0.16
104	0.775	0.16
105	0.783	0.17
106	0.79	0.17
107	0.798	0.17
108	0.805	0.16
109	0.813	0.16
110	0.82	0.15
111	0.828	0.14
112	0.835	0.14
113	0.842	0.15
114	0.85	0.16
115	0.857	0.17
116	0.865	0.18
117	0.872	0.19
118	0.88	0.19
119	0.887	0.19
120	0.895	0.19
121	0.902	0.18
122	0.91	0.18
123	0.917	0.18
124	0.924	0.18
125	0.932	0.17
126	0.939	0.16
127	0.947	0.17
128	0.954	0.16
129	0.962	0.15
130	0.969	0.14
131	0.977	0.12
132	0.984	0.11
133	0.992	0.1
134	0.999	0.11
135	1.006	0.12
136	1.014	0.15
137	1.021	0.17
138	1.029	0.18
139	1.036	0.18
140	1.044	0.17
141	1.051	0.16
142	1.059	0.15
143	1.066	0.14
144	1.074	0.15
145	1.081	0.16
146	1.088	0.17
147	1.096	0.18
148	1.103	0.19
149	1.111	0.19
150	1.118	0.19
151	1.126	0.18
152	1.133	0.17
153	1.141	0.17
154	1.148	0.17
155	1.156	0.18
156	1.163	0.18
157	1.17	0.18
158	1.178	0.19
159	1.185	0.2
160	1.193	0.21
161	1.2	0.22
162	1.208	0.23
163	1.215	0.23
164	1.223	0.22
165	1.23	0.21
166	1.238	0.2
167	1.245	0.19
168	1.252	0.18
169	1.26	0.18
170	1.267	0.17
171	1.275	0.16
172	1.282	0.16
173	1.29	0.15
174	1.297	0.14
175	1.305	0.14
176	1.312	0.14
177	1.32	0.15
178	1.327	0.15
179	1.334	0.15
180	1.342	0.15
181	1.349	0.15
182	1.357	0.15
183	1.364	0.14
184	1.372	0.14
185	1.379	0.15
186	1.387	0.16
187	1.394	0.19
188	1.402	0.21
189	1.409	0.22
190	1.416	0.23
191	1.424	0.24
192	1.431	0.23
193	1.439	0.24
194	1.446	0.23
195	1.454	0.22
196	1.461	0.21
197	1.469	0.22
198	1.476	0.22
199	1.484	0.23
200	1.491	0.22
201	1.498	0.21
202	1.506	0.2
203	1.513	0.18
204	1.521	0.17
205	1.528	0.17
206	1.536	0.17
207	1.543	0.18
208	1.551	0.19
209	1.558	0.19
210	1.565	0.18
211	1.573	0.16
212	1.58	0.16
213	1.588	0.14
214	1.595	0.11
215	1.603	0.1
216	1.61	0.09
217	1.618	0.1
218	1.625	0.11
219	1.633	0.13
220	1.64	0.16
221	1.647	0.19
222	1.655	0.21
223	1.662	0.21
224	1.67	0.21
225	1.677	0.2
226	1.685	0.2
227	1.692	0.2
228	1.7	0.2
229	1.707	0.2
230	1.715	0.19
231	1.722	0.19
232	1.729	0.18
233	1.737	0.18
234	1.744	0.17
235	1.752	0.17
236	1.759	0.18
237	1.767	0.19
238	1.774	0.19
239	1.782	0.18
240	1.789	0.18
241	1.797	0.18
242	1.804	0.16
243	1.811	0.15
244	1.819	0.14
245	1.826	0.13
246	1.834	0.12
247	1.841	0.11
248	1.849	0.11
249	1.856	0.11
250	1.864	0.12
251	1.871	0.11
252	1.879	0.1
253	1.886	0.1
254	1.893	0.1
255	1.901	0.1
256	1.908	0.1
257	1.916	0.1
258	1.923	0.11
259	1.931	0.12
260	1.938	0.14
261	1.946	0.15
262	1.953	0.15
263	1.961	0.14
264	1.968	0.13
265	1.975	0.12
266	1.983	0.11
267	1.99	0.12
268	1.998	0.13
269	2.005	0.14
270	2.013	0.15
271	2.02	0.16
272	2.028	0.16
273	2.035	0.17
274	2.043	0.17
275	2.05	0.17
276	2.057	0.15
277	2.065	0.15
278	2.072	0.17
279	2.08	0.19
280	2.087	0.22
281	2.095	0.22
282	2.102	0.23
283	2.11	0.22
284	2.117	0.21
285	2.125	0.2
286	2.132	0.18
287	2.139	0.17
288	2.147	0.17
289	2.154	0.16
290	2.162	0.16
291	2.169	0.17
292	2.177	0.17
293	2.184	0.16
294	2.192	0.15
295	2.199	0.13
296	2.207	0.11
297	2.214	0.09
298	2.221	0.1
299	2.229	0.09
300	2.236	0.09
301	2.244	0.09
302	2.251	0.1
303	2.259	0.11
304	2.266	0.11
305	2.274	0.1
306	2.281	0.1
307	2.289	0.1
308	2.296	0.1
309	2.303	0.09
310	2.311	0.09
311	2.318	0.1
312	2.326	0.11
313	2.333	0.11
314	2.341	0.12
315	2.348	0.12
316	2.356	0.12
317	2.363	0.12
318	2.371	0.11
319	2.378	0.11
320	2.385	0.11
321	2.393	0.11
322	2.4	0.11
323	2.408	0.11
324	2.415	0.11
325	2.423	0.11
326	2.43	0.12
327	2.438	0.13
328	2.445	0.14
329	2.453	0.13
330	2.46	0.12
331	2.467	0.11
332	2.475	0.1
333	2.482	0.12
334	2.49	0.13
335	2.497	0.14
336	2.505	0.15
337	2.512	0.14
338	2.52	0.13
339	2.527	0.13
340	2.534	0.12
341	2.542	0.11
342	2.549	0.11
343	2.557	0.1
344	2.564	0.09
345	2.572	0.1
346	2.579	0.1
347	2.587	0.1
348	2.594	0.11
349	2.602	0.12
350	2.609	0.12
351	2.616	0.12
352	2.624	0.12
353	2.631	0.11
354	2.639	0.1
355	2.646	0.09
356	2.654	0.09
357	2.661	0.1
358	2.669	0.1
359	2.676	0.1
360	2.684	0.11
361	2.691	0.12
362	2.698	0.12
363	2.706	0.12
364	2.713	0.12
365	2.721	0.12
366	2.728	0.12
367	2.736	0.12
368	2.743	0.1
369	2.751	0.09
370	2.758	0.09
371	2.766	0.08
372	2.773	0.08
373	2.78	0.09
374	2.788	0.1
375	2.795	0.11
376	2.803	0.12
377	2.81	0.12
378	2.818	0.12
379	2.825	0.11
380	2.833	0.1
381	2.84	0.09
382	2.848	0.09
383	2.855	0.09
384	2.862	0.1
385	2.87	0.11
386	2.877	0.12
387	2.885	0.12
388	2.892	0.12
389	2.9	0.12
390	2.907	0.12
391	2.915	0.12
392	2.922	0.11
393	2.93	0.12
394	2.937	0.12
395	2.944	0.13
396	2.952	0.15
397	2.959	0.16
398	2.967	0.16
399	2.974	0.17
400	2.982	0.16
401	2.989	0.16
402	2.997	0.16
403	3.004	0.14
404	3.012	0.14
405	3.019	0.13
406	3.026	0.12
407	3.034	0.12
408	3.041	0.12
409	3.049	0.12
410	3.056	0.12
411	3.064	0.12
412	3.071	0.12
413	3.079	0.12
414	3.086	0.11
415	3.094	0.11
416	3.101	0.11
417	3.108	0.1
418	3.116	0.11
419	3.123	0.11
420	3.131	0.1
421	3.138	0.09
422	3.146	0.08
423	3.153	0.07
424	3.161	0.06
425	3.168	0.07
426	3.176	0.07
427	3.183	0.08
428	3.19	0.1
429	3.198	0.1
430	3.205	0.1
431	3.213	0.11
432	3.22	0.11
433	3.228	0.12
434	3.235	0.14
435	3.243	0.15
436	3.25	0.16
437	3.258	0.17
438	3.265	0.17
439	3.272	0.16
440	3.28	0.15
441	3.287	0.14
442	3.295	0.13
443	3.302	0.13
444	3.31	0.13
445	3.317	0.12
446	3.325	0.12
447	3.332	0.13
448	3.34	0.13
449	3.347	0.14
450	3.354	0.14
451	3.362	0.13
452	3.369	0.12
453	3.377	0.12
454	3.384	0.13
455	3.392	0.14
456	3.399	0.15
457	3.407	0.15
458	3.414	0.15
459	3.422	0.14
460	3.429	0.13
461	3.436	0.13
462	3.444	0.13
463	3.451	0.12
464	3.459	0.12
465	3.466	0.12
466	3.474	0.11
467	3.481	0.11
468	3.489	0.11
469	3.496	0.1
470	3.503	0.09
471	3.511	0.08
472	3.518	0.09
473	3.526	0.09
474	3.533	0.1
475	3.541	0.11
476	3.548	0.12
477	3.556	0.13
478	3.563	0.14
479	3.571	0.14
480	3.578	0.14
481	3.585	0.14
482	3.593	0.14
483	3.6	0.14
484	3.608	0.13
485	3.615	0.12
486	3.623	0.12
487	3.63	0.12
488	3.638	0.13
489	3.645	0.14
490	3.653	0.15
491	3.66	0.15
492	3.667	0.14
493	3.675	0.14
494	3.682	0.12
495	3.69	0.13
496	3.697	0.13
497	3.705	0.14
498	3.712	0.13
499	3.72	0.12
500	3.727	0.12
501	3.735	0.11
502	3.742	0.11
503	3.749	0.11
504	3.757	0.12
505	3.764	0.13
506	3.772	0.13
507	3.779	0.13
508	3.787	0.14
509	3.794	0.13
510	3.802	0.13
511	3.809	0.13
512	3.817	0.14
513	3.824	0.14
514	3.831	0.14
515	3.839	0.12
516	3.846	0.1
517	3.854	0.09
518	3.861	0.09
519	3.869	0.1
520	3.876	0.12
521	3.884	0.13
522	3.891	0.14
523	3.899	0.14
524	3.906	0.13
525	3.913	0.11
526	3.921	0.09
527	3.928	0.09
528	3.936	0.09
529	3.943	0.1
530	3.951	0.1
531	3.958	0.1
532	3.966	0.1
533	3.973	0.11
534	3.981	0.1
535	3.988	0.1
536	3.995	0.11
537	4.003	0.11
538	4.01	0.1
539	4.018	0.09
540	4.025	0.08
541	4.033	0.07
542	4.04	0.07
543	4.048	0.07
544	4.055	0.07
545	4.063	0.08
546	4.07	0.09
547	4.077	0.09
548	4.085	0.08
549	4.092	0.09
550	4.1	0.1
551	4.107	0.1
552	4.115	0.11
553	4.122	0.11
554	4.13	0.11
555	4.137	0.12
556	4.145	0.11
557	4.152	0.11
558	4.159	0.11
559	4.167	0.11
560	4.174	0.11
561	4.182	0.12
562	4.189	0.13
563	4.197	0.14
564	4.204	0.16
565	4.212	0.16
566	4.219	0.16
567	4.227	0.16
568	4.234	0.16
569	4.241	0.15
570	4.249	0.15
571	4.256	0.15
572	4.264	0.14
573	4.271	0.14
574	4.279	0.14
575	4.286	0.14
576	4.294	0.14
577	4.301	0.13
578	4.309	0.13
579	4.316	0.12
580	4.323	0.12
581	4.331	0.12
582	4.338	0.12
583	4.346	0.13
584	4.353	0.13
585	4.361	0.14
586	4.368	0.13
587	4.376	0.12
588	4.383	0.11
589	4.391	0.11
590	4.398	0.1
591	4.405	0.1
592	4.413	0.1
593	4.42	0.1
594	4.428	0.09
595	4.435	0.08
596	4.443	0.08
597	4.45	0.07
598	4.458	0.08
599	4.465	0.07
600	4.472	0.08
601	4.48	0.08
602	4.487	0.1
603	4.495	0.12
604	4.502	0.14
605	4.51	0.14
606	4.517	0.14
607	4.525	0.14
608	4.532	0.13
609	4.54	0.12
610	4.547	0.11
611	4.554	0.11
612	4.562	0.13
613	4.569	0.14
614	4.577	0.14
615	4.584	0.16
616	4.592	0.17
617	4.599	0.17
618	4.607	0.18
619	4.614	0.17
620	4.622	0.17
621	4.629	0.17
622	4.636	0.17
623	4.644	0.16
624	4.651	0.16
625	4.659	0.16
626	4.666	0.15
627	4.674	0.14
628	4.681	0.14
629	4.689	0.13
630	4.696	0.12
631	4.704	0.11
632	4.711	0.11
633	4.718	0.11
634	4.726	0.11
635	4.733	0.11
636	4.741	0.12
637	4.748	0.11
638	4.756	0.1
639	4.763	0.1
640	4.771	0.09
641	4.778	0.09
642	4.786	0.09
643	4.793	0.11
644	4.8	0.12
645	4.808	0.12
646	4.815	0.12
647	4.823	0.11
648	4.83	0.11
649	4.838	0.1
650	4.845	0.1
651	4.853	0.1
652	4.86	0.1
653	4.868	0.1
654	4.875	0.1
655	4.882	0.11
656	4.89	0.11
657	4.897	0.11
658	4.905	0.1
659	4.912	0.09
660	4.92	0.08
661	4.927	0.08
662	4.935	0.08
663	4.942	0.08
664	4.95	0.08
665	4.957	0.09
666	4.964	0.1
667	4.972	0.11
668	4.979	0.11
669	4.987	0.12
670	4.994	0.12
671	5.002	0.12
672	5.009	0.12
673	5.017	0.12
674	5.024	0.12
675	5.032	0.13
676	5.039	0.14
677	5.046	0.13
678	5.054	0.14
679	5.061	0.14
680	5.069	0.14
681	5.076	0.14
682	5.084	0.14
683	5.091	0.14
684	5.099	0.14
685	5.106	0.14
686	5.114	0.14
687	5.121	0.15
688	5.128	0.15
689	5.136	0.14
690	5.143	0.14
691	5.151	0.15
692	5.158	0.16
693	5.166	0.16
694	5.173	0.17
695	5.181	0.18
696	5.188	0.17
697	5.196	0.16
698	5.203	0.15
699	5.21	0.15
700	5.218	0.13
701	5.225	0.13
702	5.233	0.13
703	5.24	0.12
704	5.248	0.11
705	5.255	0.1
706	5.263	0.09
707	5.27	0.09
708	5.278	0.1
709	5.285	0.1
710	5.292	0.1
711	5.3	0.1
712	5.307	0.09
713	5.315	0.09
714	5.322	0.08
715	5.33	0.08
716	5.337	0.08
717	5.345	0.08
718	5.352	0.08
719	5.36	0.08
720	5.367	0.08
721	5.374	0.08
722	5.382	0.08
723	5.389	0.08
724	5.397	0.08
725	5.404	0.08
726	5.412	0.08
727	5.419	0.09
728	5.427	0.09
729	5.434	0.1
730	5.442	0.11
731	5.449	0.12
732	5.456	0.13
733	5.464	0.14
734	5.471	0.14
735	5.479	0.15
736	5.486	0.15
737	5.494	0.15
738	5.501	0.15
739	5.509	0.15
740	5.516	0.15
741	5.523	0.15
742	5.531	0.14
743	5.538	0.15
744	5.546	0.15
745	5.553	0.16
746	5.561	0.16
747	5.568	0.15
748	5.576	0.14
749	5.583	0.13
750	5.591	0.12
751	5.598	0.1
752	5.605	0.1
753	5.613	0.1
754	5.62	0.1
755	5.628	0.11
756	5.635	0.11
757	5.643	0.11
758	5.65	0.11
759	5.658	0.11
760	5.665	0.1
761	5.673	0.1
762	5.68	0.09
763	5.687	0.08
764	5.695	0.08
765	5.702	0.09
766	5.71	0.09
767	5.717	0.1
768	5.725	0.09
769	5.732	0.09
770	5.74	0.08
771	5.747	0.09
772	5.755	0.1
773	5.762	0.11
774	5.769	0.11
775	5.777	0.12
776	5.784	0.12
777	5.792	0.11
778	5.799	0.11
779	5.807	0.1
780	5.814	0.11
781	5.822	0.11
782	5.829	0.1
783	5.837	0.11
784	5.844	0.11
785	5.851	0.13
786	5.859	0.14
787	5.866	0.16
788	5.874	0.16
789	5.881	0.15
790	5.889	0.14
791	5.896	0.14
792	5.904	0.13
793	5.911	0.13
794	5.919	0.12
795	5.926	0.12
796	5.933	0.12
797	5.941	0.12
798	5.948	0.12
799	5.956	0.11
800	5.963	0.12
801	5.971	0.12
802	5.978	0.13
803	5.986	0.13
804	5.993	0.14
805	6.001	0.15
806	6.008	0.16
807	6.015	0.16
808	6.023	0.16
809	6.03	0.16
810	6.038	0.16
811	6.045	0.16
812	6.053	0.16
813	6.06	0.15
814	6.068	0.14
815	6.075	0.13
816	6.083	0.11
817	6.09	0.11
818	6.097	0.1
819	6.105	0.1
820	6.112	0.09
821	6.12	0.11
822	6.127	0.11
823	6.135	0.12
824	6.142	0.12
825	6.15	0.12
826	6.157	0.1
827	6.165	0.09
828	6.172	0.09
829	6.179	0.1
830	6.187	0.11
831	6.194	0.12
832	6.202	0.14
833	6.209	0.14
834	6.217	0.14
835	6.224	0.14
836	6.232	0.14
837	6.239	0.14
838	6.247	0.14
839	6.254	0.13
840	6.261	0.12
841	6.269	0.11
842	6.276	0.1
843	6.284	0.1
844	6.291	0.1
845	6.299	0.11
846	6.306	0.11
847	6.314	0.1
848	6.321	0.1
849	6.329	0.09
850	6.336	0.09
851	6.343	0.11
852	6.351	0.12
853	6.358	0.13
854	6.366	0.13
855	6.373	0.13
856	6.381	0.14
857	6.388	0.13
858	6.396	0.13
859	6.403	0.12
860	6.411	0.12
861	6.418	0.14
862	6.425	0.15
863	6.433	0.15
864	6.44	0.16
865	6.448	0.16
866	6.455	0.16
867	6.463	0.15
868	6.47	0.15
869	6.478	0.15
870	6.485	0.15
871	6.492	0.15
872	6.5	0.14
873	6.507	0.13
874	6.515	0.13
875	6.522	0.13
876	6.53	0.12
877	6.537	0.12
878	6.545	0.11
879	6.552	0.11
880	6.56	0.1
881	6.567	0.09
882	6.574	0.08
883	6.582	0.07
884	6.589	0.07
885	6.597	0.08
886	6.604	0.08
887	6.612	0.09
888	6.619	0.09
889	6.627	0.1
890	6.634	0.09
891	6.642	0.09
892	6.649	0.09
893	6.656	0.09
894	6.664	0.1
895	6.671	0.1
896	6.679	0.1
897	6.686	0.12
898	6.694	0.14
899	6.701	0.15
900	6.709	0.16
901	6.716	0.17
902	6.724	0.17
903	6.731	0.17
904	6.738	0.17
905	6.746	0.17
906	6.753	0.18
907	6.761	0.18
908	6.768	0.18
909	6.776	0.17
910	6.783	0.16
911	6.791	0.16
912	6.798	0.15
913	6.806	0.15
914	6.813	0.15
915	6.82	0.15
916	6.828	0.14
917	6.835	0.15
918	6.843	0.14
919	6.85	0.14
920	6.858	0.14
921	6.865	0.14
922	6.873	0.14
923	6.88	0.15
924	6.888	0.16
925	6.895	0.17
926	6.902	0.17
927	6.91	0.17
928	6.917	0.15
929	6.925	0.15
930	6.932	0.13
931	6.94	0.13
932	6.947	0.13
933	6.955	0.13
934	6.962	0.13
935	6.97	0.13
936	6.977	0.13
937	6.984	0.13
938	6.992	0.13
939	6.999	0.13
940	7.007	0.13
941	7.014	0.13
942	7.022	0.12
943	7.029	0.12
944	7.037	0.13
945	7.044	0.13
946	7.052	0.14
947	7.059	0.15
948	7.066	0.16
949	7.074	0.16
950	7.081	0.17
951	7.089	0.17
952	7.096	0.18
953	7.104	0.18
954	7.111	0.18
955	7.119	0.18
956	7.126	0.18
957	7.134	0.18
958	7.141	0.19
959	7.148	0.2
960	7.156	0.21
961	7.163	0.21
962	7.171	0.21
963	7.178	0.2
964	7.186	0.18
965	7.193	0.16
966	7.201	0.15
967	7.208	0.13
968	7.216	0.13
969	7.223	0.13
970	7.23	0.13
971	7.238	0.14
972	7.245	0.15
973	7.253	0.15
974	7.26	0.15
975	7.268	0.16
976	7.275	0.18
977	7.283	0.18
978	7.29	0.2
979	7.298	0.22
980	7.305	0.24
981	7.312	0.24
982	7.32	0.26
983	7.327	0.28
984	7.335	0.31
985	7.342	0.33
986	7.35	0.31
987	7.357	0.27
988	7.365	0.23
989	7.372	0.21
990	7.38	0.23
991	7.387	0.26
992	7.394	0.26
993	7.402	0.23
994	7.409	0.18
995	7.417	0.13
996	7.424	0.11
997	7.432	0.09
998	7.439	0.07
999	7.447	0.06
1000	7.454	0.05
1001	7.461	0.05
1002	7.469	0.04
1003	7.476	0.03
1004	7.484	0.03
1005	7.491	0.02
1006	7.499	0.02
1007	7.506	0.03
1008	7.514	0.03
1009	7.521	0.04
1010	7.529	0.05
1011	7.536	0.05
1012	7.543	0.06
1013	7.551	0.06
1014	7.558	0.06
1015	7.566	0.07
1016	7.573	0.06
1017	7.581	0.06
1018	7.588	0.06
1019	7.596	0.06
1020	7.603	0.07
1021	7.611	0.07
1022	7.618	0.07
1023	7.625	0.08
1024	7.633	0.09
1025	7.64	0.09
1026	7.648	0.09
1027	7.655	0.1
1028	7.663	0.11
1029	7.67	0.11
1030	7.678	0.11
1031	7.685	0.12
1032	7.693	0.12
1033	7.7	0.13
1034	7.707	0.12
1035	7.715	0.12
1036	7.722	0.12
1037	7.73	0.12
1038	7.737	0.11
1039	7.745	0.11
1040	7.752	0.11
1041	7.76	0.11
1042	7.767	0.11
1043	7.775	0.11
1044	7.782	0.1
1045	7.789	0.09
1046	7.797	0.09
1047	7.804	0.08
1048	7.812	0.08
1049	7.819	0.07
1050	7.827	0.07
1051	7.834	0.07
1052	7.842	0.07
1053	7.849	0.06
1054	7.857	0.06
1055	7.864	0.06
1056	7.871	0.06
1057	7.879	0.06
1058	7.886	0.07
1059	7.894	0.07
1060	7.901	0.06
1061	7.909	0.06
1062	7.916	0.06
1063	7.924	0.05
1064	7.931	0.05
1065	7.939	0.04
1066	7.946	0.04
1067	7.953	0.04
1068	7.961	0.04
1069	7.968	0.05
1070	7.976	0.05
1071	7.983	0.06
1072	7.991	0.07
1073	7.998	0.07
1074	8.006	0.07
1075	8.013	0.07
1076	8.021	0.07
1077	8.028	0.07
1078	8.035	0.07
1079	8.043	0.08
1080	8.05	0.09
1081	8.058	0.1
1082	8.065	0.1
1083	8.073	0.1
1084	8.08	0.11
1085	8.088	0.1
1086	8.095	0.09
1087	8.103	0.08
1088	8.11	0.08
1089	8.117	0.08
1090	8.125	0.08
1091	8.132	0.08
1092	8.14	0.09
1093	8.147	0.09
1094	8.155	0.09
1095	8.162	0.09
1096	8.17	0.08
1097	8.177	0.07
1098	8.185	0.07
1099	8.192	0.06
1100	8.199	0.06
1101	8.207	0.07
1102	8.214	0.07
1103	8.222	0.08
1104	8.229	0.08
1105	8.237	0.08
1106	8.244	0.07
1107	8.252	0.06
1108	8.259	0.06
1109	8.267	0.05
1110	8.274	0.06
1111	8.281	0.06
1112	8.289	0.06
1113	8.296	0.05
1114	8.304	0.05
1115	8.311	0.05
1116	8.319	0.05
1117	8.326	0.05
1118	8.334	0.05
1119	8.341	0.05
1120	8.349	0.05
1121	8.356	0.04
1122	8.363	0.04
1123	8.371	0.05
1124	8.378	0.04
1125	8.386	0.05
1126	8.393	0.05
1127	8.401	0.05
1128	8.408	0.06
1129	8.416	0.07
1130	8.423	0.07
1131	8.43	0.08
1132	8.438	0.07
1133	8.445	0.07
1134	8.453	0.07
1135	8.46	0.06
1136	8.468	0.06
1137	8.475	0.06
1138	8.483	0.05
1139	8.49	0.06
1140	8.498	0.07
1141	8.505	0.08
1142	8.512	0.08
1143	8.52	0.09
1144	8.527	0.09
1145	8.535	0.1
1146	8.542	0.09
1147	8.55	0.09
1148	8.557	0.1
1149	8.565	0.1
1150	8.572	0.11
1151	8.58	0.1
1152	8.587	0.1
1153	8.594	0.09
1154	8.602	0.09
1155	8.609	0.09
1156	8.617	0.08
1157	8.624	0.08
1158	8.632	0.08
1159	8.639	0.08
1160	8.647	0.08
1161	8.654	0.09
1162	8.662	0.08
1163	8.669	0.09
1164	8.676	0.07
1165	8.684	0.07
1166	8.691	0.07
1167	8.699	0.06
1168	8.706	0.05
1169	8.714	0.05
1170	8.721	0.04
1171	8.729	0.05
1172	8.736	0.05
1173	8.744	0.05
1174	8.751	0.05
1175	8.758	0.05
1176	8.766	0.05
1177	8.773	0.05
1178	8.781	0.05
1179	8.788	0.05
1180	8.796	0.06
1181	8.803	0.06
1182	8.811	0.06
1183	8.818	0.06
1184	8.826	0.06
1185	8.833	0.05
1186	8.84	0.06
1187	8.848	0.06
1188	8.855	0.05
1189	8.863	0.06
1190	8.87	0.06
1191	8.878	0.07
1192	8.885	0.08
1193	8.893	0.07
1194	8.9	0.07
1195	8.908	0.06
1196	8.915	0.06
1197	8.922	0.08
1198	8.93	0.08
1199	8.937	0.1
1200	8.945	0.1
1201	8.952	0.11
1202	8.96	0.1
1203	8.967	0.09
1204	8.975	0.09
1205	8.982	0.09
1206	8.99	0.09
1207	8.997	0.09
1208	9.004	0.09
1209	9.012	0.09
1210	9.019	0.08
1211	9.027	0.07
1212	9.034	0.07
1213	9.042	0.06
1214	9.049	0.06
1215	9.057	0.05
1216	9.064	0.05
1217	9.072	0.05
1218	9.079	0.05
1219	9.086	0.04
1220	9.094	0.04
1221	9.101	0.05
1222	9.109	0.04
1223	9.116	0.04
1224	9.124	0.05
1225	9.131	0.05
1226	9.139	0.05
1227	9.146	0.06
1228	9.154	0.06
1229	9.161	0.06
1230	9.168	0.05
1231	9.176	0.06
1232	9.183	0.06
1233	9.191	0.07
1234	9.198	0.08
1235	9.206	0.08
1236	9.213	0.08
1237	9.221	0.07
1238	9.228	0.06
1239	9.236	0.06
1240	9.243	0.05
1241	9.25	0.05
1242	9.258	0.06
1243	9.265	0.07
1244	9.273	0.07
1245	9.28	0.08
1246	9.288	0.09
1247	9.295	0.09
1248	9.303	0.1
1249	9.31	0.1
1250	9.318	0.1
1251	9.325	0.1
1252	9.332	0.09
1253	9.34	0.09
1254	9.347	0.09
1255	9.355	0.09
1256	9.362	0.07
1257	9.37	0.07
1258	9.377	0.07
1259	9.385	0.08
1260	9.392	0.08
1261	9.399	0.09
1262	9.407	0.08
1263	9.414	0.08
1264	9.422	0.08
1265	9.429	0.08
1266	9.437	0.07
1267	9.444	0.08
1268	9.452	0.07
1269	9.459	0.07
1270	9.467	0.07
1271	9.474	0.08
1272	9.481	0.08
1273	9.489	0.09
1274	9.496	0.09
1275	9.504	0.07
1276	9.511	0.07
1277	9.519	0.06
1278	9.526	0.06
1279	9.534	0.05
1280	9.541	0.05
1281	9.549	0.05
1282	9.556	0.05
1283	9.563	0.06
1284	9.571	0.06
1285	9.578	0.07
1286	9.586	0.08
1287	9.593	0.09
1288	9.601	0.1
1289	9.608	0.11
1290	9.616	0.12
1291	9.623	0.11
1292	9.631	0.09
1293	9.638	0.07
1294	9.645	0.06
1295	9.653	0.07
1296	9.66	0.06
1297	9.668	0.06
1298	9.675	0.06
1299	9.683	0.06
1300	9.69	0.06
1301	9.698	0.05
1302	9.705	0.06
1303	9.713	0.07
1304	9.72	0.07
1305	9.727	0.08
1306	9.735	0.08
1307	9.742	0.09
1308	9.75	0.09
1309	9.757	0.08
1310	9.765	0.08
1311	9.772	0.09
1312	9.78	0.09
1313	9.787	0.09
1314	9.795	0.11
1315	9.802	0.11
1316	9.809	0.11
1317	9.817	0.11
1318	9.824	0.11
1319	9.832	0.11
1320	9.839	0.1
1321	9.847	0.1
1322	9.854	0.1
1323	9.862	0.1
1324	9.869	0.11
1325	9.877	0.11
1326	9.884	0.11
1327	9.891	0.11
1328	9.899	0.09
1329	9.906	0.09
1330	9.914	0.09
1331	9.921	0.09
1332	9.929	0.1
1333	9.936	0.1
1334	9.944	0.1
1335	9.951	0.11
1336	9.959	0.11
1337	9.966	0.12
1338	9.973	0.12
1339	9.981	0.11
1340	9.988	0.11
1341	9.996	0.1
1342	10.003	0.09
1343	10.011	0.08
1344	10.018	0.07
1345	10.026	0.07
1346	10.033	0.08
1347	10.041	0.07
1348	10.048	0.08
1349	10.055	0.08
1350	10.063	0.09
1351	10.07	0.09
1352	10.078	0.09
1353	10.085	0.09
1354	10.093	0.09
1355	10.1	0.08
1356	10.108	0.08
1357	10.115	0.08
1358	10.123	0.08
1359	10.13	0.09
1360	10.137	0.1
1361	10.145	0.1
1362	10.152	0.11
1363	10.16	0.12
1364	10.167	0.13
1365	10.175	0.14
1366	10.182	0.15
1367	10.19	0.15
1368	10.197	0.16
1369	10.205	0.16
1370	10.212	0.18
1371	10.219	0.19
1372	10.227	0.19
1373	10.234	0.18
1374	10.242	0.17
1375	10.249	0.14
1376	10.257	0.13
1377	10.264	0.12
1378	10.272	0.12
1379	10.279	0.14
1380	10.287	0.14
1381	10.294	0.13
1382	10.301	0.12
1383	10.309	0.11
1384	10.316	0.11
1385	10.324	0.1
1386	10.331	0.1
1387	10.339	0.11
1388	10.346	0.12
1389	10.354	0.13
1390	10.361	0.14
1391	10.369	0.15
1392	10.376	0.14
1393	10.383	0.12
1394	10.391	0.11
1395	10.398	0.1
1396	10.406	0.09
1397	10.413	0.09
1398	10.421	0.08
1399	10.428	0.08
1400	10.436	0.09
1401	10.443	0.09
1402	10.45	0.09
1403	10.458	0.1
1404	10.465	0.1
1405	10.473	0.1
1406	10.48	0.09
1407	10.488	0.11
1408	10.495	0.13
1409	10.503	0.14
1410	10.51	0.15
1411	10.518	0.14
1412	10.525	0.13
1413	10.532	0.12
1414	10.54	0.12
1415	10.547	0.12
1416	10.555	0.11
1417	10.562	0.1
1418	10.57	0.09
1419	10.577	0.09
1420	10.585	0.09
1421	10.592	0.09
1422	10.6	0.09
1423	10.607	0.09
1424	10.614	0.09
1425	10.622	0.09
1426	10.629	0.09
1427	10.637	0.1
1428	10.644	0.1
1429	10.652	0.11
1430	10.659	0.11
1431	10.667	0.12
1432	10.674	0.12
1433	10.682	0.13
1434	10.689	0.14
1435	10.696	0.13
1436	10.704	0.13
1437	10.711	0.12
1438	10.719	0.12
1439	10.726	0.12
1440	10.734	0.13
1441	10.741	0.13
1442	10.749	0.12
1443	10.756	0.12
1444	10.764	0.11
1445	10.771	0.11
1446	10.778	0.12
1447	10.786	0.14
1448	10.793	0.15
1449	10.801	0.14
1450	10.808	0.13
1451	10.816	0.12
1452	10.823	0.11
1453	10.831	0.1
1454	10.838	0.08
1455	10.846	0.08
1456	10.853	0.08
1457	10.86	0.08
1458	10.868	0.08
1459	10.875	0.07
1460	10.883	0.07
1461	10.89	0.06
1462	10.898	0.07
1463	10.905	0.07
1464	10.913	0.07
1465	10.92	0.07
1466	10.928	0.07
1467	10.935	0.07
1468	10.942	0.06
1469	10.95	0.06
1470	10.957	0.06
1471	10.965	0.06
1472	10.972	0.06
1473	10.98	0.07
1474	10.987	0.07
1475	10.995	0.08
1476	11.002	0.08
1477	11.01	0.09
1478	11.017	0.1
1479	11.024	0.11
1480	11.032	0.12
1481	11.039	0.14
1482	11.047	0.16
1483	11.054	0.16
1484	11.062	0.16
1485	11.069	0.17
1486	11.077	0.16
1487	11.084	0.15
1488	11.092	0.14
1489	11.099	0.13
1490	11.106	0.11
1491	11.114	0.11
1492	11.121	0.11
1493	11.129	0.11
1494	11.136	0.13
1495	11.144	0.14
1496	11.151	0.14
1497	11.159	0.14
1498	11.166	0.13
1499	11.174	0.11
1500	11.181	0.1
1501	11.188	0.11
1502	11.196	0.1
1503	11.203	0.09
1504	11.211	0.09
1505	11.218	0.09
1506	11.226	0.08
1507	11.233	0.07
1508	11.241	0.07
1509	11.248	0.06
1510	11.256	0.07
1511	11.263	0.07
1512	11.27	0.07
1513	11.278	0.06
1514	11.285	0.07
1515	11.293	0.06
1516	11.3	0.06
1517	11.308	0.06
1518	11.315	0.06
1519	11.323	0.06
1520	11.33	0.06
1521	11.338	0.06
1522	11.345	0.05
1523	11.352	0.05
1524	11.36	0.05
1525	11.367	0.05
1526	11.375	0.05
1527	11.382	0.06
1528	11.39	0.06
1529	11.397	0.07
1530	11.405	0.07
1531	11.412	0.09
1532	11.419	0.1
1533	11.427	0.11
1534	11.434	0.11
1535	11.442	0.12
1536	11.449	0.11
1537	11.457	0.11
1538	11.464	0.11
1539	11.472	0.11
1540	11.479	0.11
1541	11.487	0.1
1542	11.494	0.1
1543	11.501	0.1
1544	11.509	0.1
1545	11.516	0.1
1546	11.524	0.1
1547	11.531	0.1
1548	11.539	0.1
1549	11.546	0.09
1550	11.554	0.09
1551	11.561	0.1
1552	11.569	0.1
1553	11.576	0.09
1554	11.583	0.09
1555	11.591	0.09
1556	11.598	0.08
1557	11.606	0.07
1558	11.613	0.07
1559	11.621	0.07
1560	11.628	0.07
1561	11.636	0.07
1562	11.643	0.07
1563	11.651	0.07
1564	11.658	0.08
1565	11.665	0.08
1566	11.673	0.09
1567	11.68	0.09
1568	11.688	0.09
1569	11.695	0.08
1570	11.703	0.08
1571	11.71	0.07
1572	11.718	0.08
1573	11.725	0.07
1574	11.733	0.07
1575	11.74	0.06
1576	11.747	0.06
1577	11.755	0.07
1578	11.762	0.09
1579	11.77	0.11
1580	11.777	0.11
1581	11.785	0.11
1582	11.792	0.1
1583	11.8	0.08
1584	11.807	0.07
1585	11.815	0.06
1586	11.822	0.06
1587	11.829	0.06
1588	11.837	0.06
1589	11.844	0.06
1590	11.852	0.06
1591	11.859	0.06
1592	11.867	0.06
1593	11.874	0.06
1594	11.882	0.06
1595	11.889	0.06
1596	11.897	0.07
1597	11.904	0.08
1598	11.911	0.07
1599	11.919	0.07
1600	11.926	0.07
1601	11.934	0.07
1602	11.941	0.07
1603	11.949	0.09
1604	11.956	0.1
1605	11.964	0.12
1606	11.971	0.13
1607	11.979	0.13
1608	11.986	0.13
1609	11.993	0.13
1610	12.001	0.12
1611	12.008	0.13
1612	12.016	0.12
1613	12.023	0.13
1614	12.031	0.12
1615	12.038	0.12
1616	12.046	0.12
1617	12.053	0.13
1618	12.061	0.12
1619	12.068	0.11
1620	12.075	0.11
1621	12.083	0.1
1622	12.09	0.1
1623	12.098	0.11
1624	12.105	0.11
1625	12.113	0.1
1626	12.12	0.1
1627	12.128	0.09
1628	12.135	0.09
1629	12.143	0.1
1630	12.15	0.1
1631	12.157	0.1
1632	12.165	0.11
1633	12.172	0.11
1634	12.18	0.11
1635	12.187	0.11
1636	12.195	0.1
1637	12.202	0.09
1638	12.21	0.08
1639	12.217	0.08
1640	12.225	0.09
1641	12.232	0.11
1642	12.239	0.11
1643	12.247	0.11
1644	12.254	0.11
1645	12.262	0.11
1646	12.269	0.11
1647	12.277	0.09
1648	12.284	0.09
1649	12.292	0.08
1650	12.299	0.08
1651	12.307	0.08
1652	12.314	0.08
1653	12.321	0.08
1654	12.329	0.09
1655	12.336	0.09
1656	12.344	0.1
1657	12.351	0.11
1658	12.359	0.11
1659	12.366	0.12
1660	12.374	0.13
1661	12.381	0.13
1662	12.388	0.13
1663	12.396	0.12
1664	12.403	0.11
1665	12.411	0.11
1666	12.418	0.11
1667	12.426	0.12
1668	12.433	0.13
1669	12.441	0.14
1670	12.448	0.15
1671	12.456	0.16
1672	12.463	0.15
1673	12.47	0.13
1674	12.478	0.12
1675	12.485	0.11
1676	12.493	0.1
1677	12.5	0.1
1678	12.508	0.09
1679	12.515	0.09
1680	12.523	0.08
1681	12.53	0.08
1682	12.538	0.08
1683	12.545	0.07
1684	12.552	0.08
1685	12.56	0.08
1686	12.567	0.07
1687	12.575	0.07
1688	12.582	0.07
1689	12.59	0.07
1690	12.597	0.07
1691	12.605	0.07
1692	12.612	0.07
1693	12.62	0.08
1694	12.627	0.08
1695	12.634	0.09
1696	12.642	0.09
1697	12.649	0.1
1698	12.657	0.1
1699	12.664	0.1
1700	12.672	0.09
1701	12.679	0.09
1702	12.687	0.09
1703	12.694	0.1
1704	12.702	0.12
1705	12.709	0.13
1706	12.716	0.14
1707	12.724	0.15
1708	12.731	0.14
1709	12.739	0.14
1710	12.746	0.13
1711	12.754	0.13
1712	12.761	0.13
1713	12.769	0.13
1714	12.776	0.14
1715	12.784	0.14
1716	12.791	0.14
1717	12.798	0.14
1718	12.806	0.14
1719	12.813	0.14
1720	12.821	0.14
1721	12.828	0.14
1722	12.836	0.13
1723	12.843	0.11
1724	12.851	0.1
1725	12.858	0.09
1726	12.866	0.09
1727	12.873	0.1
1728	12.88	0.11
1729	12.888	0.12
1730	12.895	0.12
1731	12.903	0.12
1732	12.91	0.11
1733	12.918	0.1
1734	12.925	0.1
1735	12.933	0.09
1736	12.94	0.09
1737	12.948	0.09
1738	12.955	0.09
1739	12.962	0.09
1740	12.97	0.07
1741	12.977	0.07
1742	12.985	0.07
1743	12.992	0.07
1744	13	0.08
1745	13.007	0.08
1746	13.015	0.09
1747	13.022	0.09
1748	13.03	0.09
1749	13.037	0.09
1750	13.044	0.09
1751	13.052	0.09
1752	13.059	0.08
1753	13.067	0.07
1754	13.074	0.06
1755	13.082	0.05
1756	13.089	0.05
1757	13.097	0.06
1758	13.104	0.07
1759	13.112	0.08
1760	13.119	0.1
1761	13.126	0.1
1762	13.134	0.1
1763	13.141	0.09
1764	13.149	0.09
1765	13.156	0.1
1766	13.164	0.11
1767	13.171	0.11
1768	13.179	0.13
1769	13.186	0.14
1770	13.194	0.14
1771	13.201	0.13
1772	13.208	0.12
1773	13.216	0.12
1774	13.223	0.11
1775	13.231	0.1
1776	13.238	0.1
1777	13.246	0.09
1778	13.253	0.09
1779	13.261	0.09
1780	13.268	0.09
1781	13.276	0.1
1782	13.283	0.1
1783	13.29	0.11
1784	13.298	0.11
1785	13.305	0.11
1786	13.313	0.11
1787	13.32	0.12
1788	13.328	0.12
1789	13.335	0.13
1790	13.343	0.12
1791	13.35	0.12
1792	13.357	0.12
1793	13.365	0.11
1794	13.372	0.1
1795	13.38	0.1
1796	13.387	0.1
1797	13.395	0.09
1798	13.402	0.07
1799	13.41	0.07
1800	13.417	0.05
1801	13.425	0.05
1802	13.432	0.05
1803	13.439	0.05
1804	13.447	0.05
1805	13.454	0.04
1806	13.462	0.04
1807	13.469	0.04
1808	13.477	0.04
1809	13.484	0.04
1810	13.492	0.04
1811	13.499	0.04
1812	13.507	0.05
1813	13.514	0.05
1814	13.521	0.05
1815	13.529	0.06
1816	13.536	0.05
1817	13.544	0.06
1818	13.551	0.06
1819	13.559	0.07
1820	13.566	0.07
1821	13.574	0.07
1822	13.581	0.07
1823	13.589	0.07
1824	13.596	0.08
1825	13.603	0.08
1826	13.611	0.09
1827	13.618	0.09
1828	13.626	0.09
1829	13.633	0.09
1830	13.641	0.1
1831	13.648	0.1
1832	13.656	0.1
1833	13.663	0.1
1834	13.671	0.1
1835	13.678	0.1
1836	13.685	0.1
1837	13.693	0.11
1838	13.7	0.1
1839	13.708	0.09
1840	13.715	0.09
1841	13.723	0.09
1842	13.73	0.08
1843	13.738	0.08
1844	13.745	0.08
1845	13.753	0.07
1846	13.76	0.06
1847	13.767	0.05
1848	13.775	0.05
1849	13.782	0.04
1850	13.79	0.04
1851	13.797	0.04
1852	13.805	0.04
1853	13.812	0.04
1854	13.82	0.04
1855	13.827	0.04
1856	13.835	0.05
1857	13.842	0.06
1858	13.849	0.06
1859	13.857	0.06
1860	13.864	0.05
1861	13.872	0.05
1862	13.879	0.05
1863	13.887	0.05
1864	13.894	0.05
1865	13.902	0.05
1866	13.909	0.06
1867	13.917	0.06
1868	13.924	0.07
1869	13.931	0.08
1870	13.939	0.09
1871	13.946	0.09
1872	13.954	0.1
1873	13.961	0.09
1874	13.969	0.1
1875	13.976	0.09
1876	13.984	0.09
1877	13.991	0.08
1878	13.999	0.08
1879	14.006	0.08
1880	14.013	0.07
1881	14.021	0.07
1882	14.028	0.07
1883	14.036	0.07
1884	14.043	0.08
1885	14.051	0.08
1886	14.058	0.08
1887	14.066	0.08
1888	14.073	0.08
1889	14.081	0.07
1890	14.088	0.07
1891	14.095	0.08
1892	14.103	0.08
1893	14.11	0.09
1894	14.118	0.09
1895	14.125	0.09
1896	14.133	0.09
1897	14.14	0.08
1898	14.148	0.08
1899	14.155	0.07
1900	14.163	0.08
1901	14.17	0.08
1902	14.177	0.08
1903	14.185	0.1
1904	14.192	0.11
1905	14.2	0.11
1906	14.207	0.1
1907	14.215	0.08
1908	14.222	0.08
1909	14.23	0.06
1910	14.237	0.05
1911	14.245	0.04
1912	14.252	0.04
1913	14.259	0.05
1914	14.267	0.05
1915	14.274	0.06
1916	14.282	0.06
1917	14.289	0.07
1918	14.297	0.07
1919	14.304	0.07
1920	14.312	0.06
1921	14.319	0.06
1922	14.327	0.07
1923	14.334	0.06
1924	14.341	0.06
1925	14.349	0.06
1926	14.356	0.06
1927	14.364	0.06
1928	14.371	0.06
1929	14.379	0.06
1930	14.386	0.06
1931	14.394	0.07
1932	14.401	0.07
1933	14.408	0.07
1934	14.416	0.08
1935	14.423	0.08
1936	14.431	0.08
1937	14.438	0.08
1938	14.446	0.07
1939	14.453	0.07
1940	14.461	0.07
1941	14.468	0.07
1942	14.476	0.07
1943	14.483	0.08
1944	14.49	0.08
1945	14.498	0.09
1946	14.505	0.09
1947	14.513	0.1
1948	14.52	0.11
1949	14.528	0.11
1950	14.535	0.11
1951	14.543	0.1
1952	14.55	0.09
1953	14.558	0.07
1954	14.565	0.06
1955	14.572	0.05
1956	14.58	0.06
1957	14.587	0.07
1958	14.595	0.08
1959	14.602	0.09
1960	14.61	0.09
1961	14.617	0.08
1962	14.625	0.08
1963	14.632	0.07
1964	14.64	0.06
1965	14.647	0.05
1966	14.654	0.05
1967	14.662	0.06
1968	14.669	0.06
1969	14.677	0.06
1970	14.684	0.06
1971	14.692	0.07
1972	14.699	0.07
1973	14.707	0.06
1974	14.714	0.06
1975	14.722	0.06
1976	14.729	0.06
1977	14.736	0.05
1978	14.744	0.06
1979	14.751	0.06
1980	14.759	0.05
1981	14.766	0.05
1982	14.774	0.05
1983	14.781	0.06
1984	14.789	0.07
1985	14.796	0.07
1986	14.804	0.07
1987	14.811	0.07
1988	14.818	0.06
1989	14.826	0.06
1990	14.833	0.07
1991	14.841	0.07
1992	14.848	0.08
1993	14.856	0.08
1994	14.863	0.08
1995	14.871	0.08
1996	14.878	0.07
1997	14.886	0.07
[truncated: 4,042 more rows]
